# Supplementary material
Source: ML conference proceedings conference paper supplement (https://proceedings.neurips.cc/paper_files/paper/2021/hash/d1ee59e20ad01cedc15f5118a7626099-Abstract.html)
Supplement: Supplementary file 1 [file d1ee59e20ad01cedc15f5118a7626099-Supplemental.zip]

Archive with 82 entries (73 files):
- neurips21_supplementary/
- __MACOSX/._neurips21_supplementary
- neurips21_supplementary/.DS_Store
- __MACOSX/neurips21_supplementary/._.DS_Store
- neurips21_supplementary/code/
- __MACOSX/neurips21_supplementary/._code
- neurips21_supplementary/pdf/
- __MACOSX/neurips21_supplementary/._pdf
- neurips21_supplementary/README.html
- __MACOSX/neurips21_supplementary/._README.html
- neurips21_supplementary/img/
- __MACOSX/neurips21_supplementary/._img
- neurips21_supplementary/videos/
- __MACOSX/neurips21_supplementary/._videos
- neurips21_supplementary/code/config.py
- __MACOSX/neurips21_supplementary/code/._config.py
- neurips21_supplementary/code/LICENSE
- __MACOSX/neurips21_supplementary/code/._LICENSE
- neurips21_supplementary/code/environment.yml
- __MACOSX/neurips21_supplementary/code/._environment.yml
- neurips21_supplementary/code/classification.py
- __MACOSX/neurips21_supplementary/code/._classification.py
- neurips21_supplementary/code/loss_util.py
- __MACOSX/neurips21_supplementary/code/._loss_util.py
- neurips21_supplementary/code/util.py
- __MACOSX/neurips21_supplementary/code/._util.py
- neurips21_supplementary/code/data_utils/
- __MACOSX/neurips21_supplementary/code/._data_utils
- neurips21_supplementary/code/models/
- __MACOSX/neurips21_supplementary/code/._models
- neurips21_supplementary/code/docs/
- __MACOSX/neurips21_supplementary/code/._docs
- neurips21_supplementary/code/README.md
- __MACOSX/neurips21_supplementary/code/._README.md
- neurips21_supplementary/code/vis_util.py
- __MACOSX/neurips21_supplementary/code/._vis_util.py
- neurips21_supplementary/code/geom_torch.py
- __MACOSX/neurips21_supplementary/code/._geom_torch.py
- neurips21_supplementary/code/network.py
- __MACOSX/neurips21_supplementary/code/._network.py
- neurips21_supplementary/code/main.py
- __MACOSX/neurips21_supplementary/code/._main.py
- neurips21_supplementary/pdf/supplementary_appendix.pdf
- __MACOSX/neurips21_supplementary/pdf/._supplementary_appendix.pdf
- neurips21_supplementary/img/icon.png
- __MACOSX/neurips21_supplementary/img/._icon.png
- neurips21_supplementary/videos/combined_CAT9_12_compressed.mp4
- __MACOSX/neurips21_supplementary/videos/._combined_CAT9_12_compressed.mp4
- neurips21_supplementary/videos/single.mp4
- __MACOSX/neurips21_supplementary/videos/._single.mp4
- neurips21_supplementary/videos/.DS_Store
- __MACOSX/neurips21_supplementary/videos/._.DS_Store
- neurips21_supplementary/videos/teaser.mp4
- __MACOSX/neurips21_supplementary/videos/._teaser.mp4
- neurips21_supplementary/videos/combined_CAT4_9_compressed.mp4
- __MACOSX/neurips21_supplementary/videos/._combined_CAT4_9_compressed.mp4
- neurips21_supplementary/videos/multiclass.mp4
- __MACOSX/neurips21_supplementary/videos/._multiclass.mp4
- neurips21_supplementary/videos/combined_CAT9_7_compressed.mp4
- __MACOSX/neurips21_supplementary/videos/._combined_CAT9_7_compressed.mp4
- neurips21_supplementary/videos/combined_CAT4_10_compressed.mp4
- __MACOSX/neurips21_supplementary/videos/._combined_CAT4_10_compressed.mp4
- neurips21_supplementary/videos/combined_CAT4_15_compressed.mp4
- __MACOSX/neurips21_supplementary/videos/._combined_CAT4_15_compressed.mp4
- neurips21_supplementary/videos/combined_CAT9_3_compressed.mp4
- __MACOSX/neurips21_supplementary/videos/._combined_CAT9_3_compressed.mp4
- neurips21_supplementary/code/data_utils/ShapeNetLoader.py
- __MACOSX/neurips21_supplementary/code/data_utils/._ShapeNetLoader.py
- neurips21_supplementary/code/models/model_utils/
- __MACOSX/neurips21_supplementary/code/models/._model_utils
- neurips21_supplementary/code/models/acne_ae.py
- __MACOSX/neurips21_supplementary/code/models/._acne_ae.py
- neurips21_supplementary/code/models/__init__.py
- __MACOSX/neurips21_supplementary/code/models/.___init__.py
- neurips21_supplementary/code/docs/teaser.gif
- __MACOSX/neurips21_supplementary/code/docs/._teaser.gif
- neurips21_supplementary/code/models/model_utils/decode_utils.py
- __MACOSX/neurips21_supplementary/code/models/model_utils/._decode_utils.py
- neurips21_supplementary/code/models/model_utils/__init__.py
- __MACOSX/neurips21_supplementary/code/models/model_utils/.___init__.py
- neurips21_supplementary/code/models/model_utils/acne_utils.py
- __MACOSX/neurips21_supplementary/code/models/model_utils/._acne_utils.py
