# Supplementary material
Source: ML conference proceedings conference paper supplement (https://proceedings.neurips.cc/paper_files/paper/2021/hash/d1ee59e20ad01cedc15f5118a7626099-Abstract.html)
Supplement: Supplementary file 1 [file d1ee59e20ad01cedc15f5118a7626099-Supplemental.zip › neurips21_supplementary/code/environment.yml]

name: pcd
channels:
  - conda-forge
  - pytorch
  - defaults
dependencies:
  - _libgcc_mutex=0.1=main
  - blas=1.0=mkl
  - ca-certificates=2020.7.22=0
  - certifi=2020.6.20=py37_0
  - cudatoolkit=9.0=h13b8566_0
  - cycler=0.10.0=py37_0
  - dbus=1.13.16=hb2f20db_0
  - expat=2.2.9=he6710b0_2
  - faiss-gpu=1.6.3=py37h32c130d_0
  - fontconfig=2.13.0=h9420a91_0
  - freetype=2.10.2=h5ab3b9f_0
  - glib=2.65.0=h3eb4bd4_0
  - gst-plugins-base=1.14.0=hbbd80ab_1
  - gstreamer=1.14.0=hb31296c_0
  - h5py=2.10.0=py37h7918eee_0
  - hdf5=1.10.4=hb1b8bf9_0
  - icu=58.2=he6710b0_3
  - intel-openmp=2020.1=217
  - joblib=0.17.0=py_0
  - jpeg=9b=h024ee3a_2
  - kiwisolver=1.2.0=py37hfd86e86_0
  - ld_impl_linux-64=2.33.1=h53a641e_7
  - libedit=3.1.20181209=hc058e9b_0
  - libffi=3.3=he6710b0_1
  - libgcc-ng=9.1.0=hdf63c60_0
  - libgfortran-ng=7.3.0=hdf63c60_0
  - libpng=1.6.37=hbc83047_0
  - libstdcxx-ng=9.1.0=hdf63c60_0
  - libuuid=1.0.3=h1bed415_2
  - libxcb=1.14=h7b6447c_0
  - libxml2=2.9.10=he19cac6_1
  - llvm-openmp=8.0.1=hc9558a2_0
  - matplotlib=3.1.3=py37_0
  - matplotlib-base=3.1.3=py37hef1b27d_0
  - mkl=2020.1=217
  - mkl-service=2.3.0=py37he904b0f_0
  - mkl_fft=1.0.15=py37ha843d7b_0
  - mkl_random=1.1.1=py37h0573a6f_0
  - ncurses=6.2=he6710b0_1
  - numpy-base=1.18.1=py37hde5b4d6_1
  - openmp=8.0.1=0
  - openssl=1.1.1h=h7b6447c_0
  - pcre=8.44=he6710b0_0
  - pip=20.0.2=py37_3
  - point_cloud_utils=0.15.1=py37h429e714_2
  - pyparsing=2.4.7=py_0
  - pyqt=5.9.2=py37h05f1152_2
  - python=3.7.7=hcff3b4d_5
  - python-dateutil=2.8.1=py_0
  - python_abi=3.7=1_cp37m
  - qt=5.9.7=h5867ecd_1
  - readline=8.0=h7b6447c_0
  - scikit-learn=0.23.2=py37h0573a6f_0
  - scipy=1.4.1=py37h0b6359f_0
  - setuptools=47.1.1=py37_0
  - sip=4.19.8=py37hf484d3e_0
  - six=1.15.0=py_0
  - sqlite=3.31.1=h62c20be_1
  - threadpoolctl=2.1.0=pyh5ca1d4c_0
  - tk=8.6.8=hbc83047_0
  - tornado=6.0.4=py37h7b6447c_1
  - tqdm=4.46.0=py_0
  - wheel=0.34.2=py37_0
  - xz=5.2.5=h7b6447c_0
  - zlib=1.2.11=h7b6447c_3
  - pip:
    - appdirs==1.4.4
    - argon2-cffi==20.1.0
    - async-generator==1.10
    - attrs==20.2.0
    - backcall==0.2.0
    - bleach==3.2.1
    - cffi==1.14.3
    - decorator==4.4.2
    - defusedxml==0.6.0
    - entrypoints==0.3
    - future==0.18.2
    - importlib-metadata==2.0.0
    - ipykernel==5.3.4
    - ipython==7.18.1
    - ipython-genutils==0.2.0
    - ipywidgets==7.5.1
    - jedi==0.17.2
    - jinja2==2.11.2
    - jsonschema==3.2.0
    - jupyter==1.0.0
    - jupyter-client==6.1.7
    - jupyter-console==6.2.0
    - jupyter-core==4.6.3
    - jupyterlab-pygments==0.1.2
    - mako==1.1.3
    - markupsafe==1.1.1
    - mistune==0.8.4
    - nbclient==0.5.0
    - nbconvert==6.0.7
    - nbformat==5.0.8
    - nest-asyncio==1.4.1
    - notebook==6.1.4
    - numpy==1.18.5
    - opencv-contrib-python==3.4.2.17
    - packaging==20.4
    - pandocfilters==1.4.2
    - parso==0.7.1
    - pexpect==4.8.0
    - pickleshare==0.7.5
    - pillow==7.1.2
    - prometheus-client==0.8.0
    - prompt-toolkit==3.0.8
    - protobuf==3.12.2
    - ptyprocess==0.6.0
    - pycparser==2.20
    - pycuda==2020.1
    - pygments==2.7.1
    - pyrsistent==0.17.3
    - pytools==2020.4.3
    - pyzmq==19.0.2
    - qtconsole==4.7.7
    - qtpy==1.9.0
    - send2trash==1.5.0
    - tensorboardx==2.0
    - terminado==0.9.1
    - testpath==0.4.4
    - torch==1.2.0
    - torchvision==0.4.0
    - traitlets==5.0.4
    - wcwidth==0.2.5
    - webencodings==0.5.1
    - widgetsnbextension==3.5.1
    - zipp==3.3.0
prefix: /home/user/miniconda3/envs/pcd
