# Supplementary material
Source: ML conference proceedings conference paper supplement (https://proceedings.neurips.cc/paper_files/paper/2021/hash/d1ee59e20ad01cedc15f5118a7626099-Abstract.html)
Supplement: Supplementary file 1 [file d1ee59e20ad01cedc15f5118a7626099-Supplemental.zip › neurips21_supplementary/README.html]

Canonical Capsules:Self-Supervised Capsules in Canonical Pose


## Canonical Capsules:Self-Supervised Capsules in Canonical Pose

Paper ID: 1370

  
  

### Overview of Supplementary Material

In this supplementary material, we provide:

1. **The teaser video** which briefly summarizes our framework.
2. **The supplementary appendix** which provides architectural details and additional results.
3. **Qualitative results of canonicalization** which show the stability of canonicalization.
4. **Qualitative results of reconstruction and decomposition** in unaligned setup.

  
  

### Teaser Video

**TL;DR:** A self-supervised capsule architecture that canonicalizes data
while simultaneously decomposing point clouds into parts to perform unsupervised representation learning.

  

**Abstract:**
We propose an unsupervised capsule architecture for 3D point clouds.
We compute capsule decompositions of objects through permutation-equivariant attention, and self-supervise the process by training with pairs of randomly rotated objects.
Our key idea is to aggregate the attention masks into semantic keypoints,
and use these to supervise a decomposition that satisfies the capsule invariance/equivariance properties.
This not only enables the training of a semantically consistent decomposition, but also allows us to learn a canonicalization operation that enables object-centric reasoning.
To train our neural network we require neither classification labels nor manually-aligned training datasets.
Yet, by learning an object-centric representation in a self-supervised manner, our method outperforms the state-of-the-art on 3D point cloud reconstruction, canonicalization, and unsupervised classification.

  
  

[

](videos/teaser.mp4)
  

### Supplementary Appendix

Architectural details, additional ablation studies, and qualitative results for the aligned setup are available in supplementary appendix.
For more details, **Click** the image below to access the PDF

  
  

### Code

We provide [code in the accompanied subfolder].
Please see [README.md] for detailed instructions regarding the code.

  
  

### Canonicalization

Below are example videos demonstrating the quality of canonicalization. Our method achieves more stable canonicalization compared to Compass -- shown by the chairs and airplanes being well-aligned despite appearance changes.

|  |  |  |  |  |  |
| --- | --- | --- | --- | --- | --- |
|  | | |  | | |
|  | | |  | | |
|  | | |  | | |
| Input | Aligned by *Ours* | Aligned by Compass | Input | Aligned by *Ours* | Aligned by Compass |

  
  

### Reconstruction and Decomposition

We show qualitative highlights, where we decompose 3D point
clouds and auto-encode them using Canonical Capsules. We color each
Canonical Capsule with a unique colour, and similarly color "patches"
from the reconstruction heads of 3D-PointCapsNet and AtlasNetV2.
Canonical Capsules provide semantically consistent decomposition that
is aligned in the canonical frame, leading to improved reconstruction
quality and unsupervised classification performance.

  
  
  

|  |  |  |  |  |  |
| --- | --- | --- | --- | --- | --- |
| Results with the single-category Canonical Capsules | | | | | |
|  | | | | | |
| Input | Decomposition | *Ours* reconstruction in canonical frame - not a still image! | *Ours* reconstruction in input frame | 3D-PointCapsNet reconstruction | AtlasNetV2 reconstruction |

  

|  |  |  |  |  |  |
| --- | --- | --- | --- | --- | --- |
| Results with the multi-category Canonical Capsules | | | | | |
|  | | | | | |
| Input | Decomposition | *Ours* reconstruction in canonical frame | *Ours* reconstruction in input frame | 3D-PointCapsNet reconstruction | AtlasNetV2 reconstruction |

---

The supplementary videos are encoded by FFMPEG with h.264 codec. If you can't play the video, please
download the VLC player at: http://www.videolan.org/vlc/index.html

---
